# Pollen Patterns Form from Modulated Phases

Asja Radja<sup>1</sup>, Eric M. Horsley<sup>1</sup>, Maxim O. Lavrentovich<sup>2\*</sup>, and Alison M. Sweeney<sup>1\*</sup>

[asjar@sas.upenn.edu](mailto:asjar@sas.upenn.edu)

[ehorsley@sas.upenn.edu](mailto:ehorsley@sas.upenn.edu)

[\\*mlavrent@utk.edu](mailto:*mlavrent@utk.edu)

[\\*alisonsw@sas.upenn.edu](mailto:*alisonsw@sas.upenn.edu)

<sup>1</sup>Department of Physics and Astronomy, University of Pennsylvania, 209 S. 33<sup>rd</sup> St., Philadelphia, Pennsylvania 19104, U.S.A.

<sup>2</sup>Department of Physics and Astronomy, University of Tennessee, 1408 Circle Dr., Knoxville, Tennessee 37996, U.S.A

\*Co-corresponding authors

## 1 **Abstract**

2 Pollen grains are known for their impressive variety of species-specific, microscale  
3 surface patterning. Despite having similar biological developmental steps, pollen grain surface  
4 features are remarkably geometrically varied. Previous work suggests that a physical process  
5 may drive this pattern formation and that the observed diversity of patterns can be explained by  
6 viewing pollen pattern development as a phase transition to a spatially modulated phase. Several  
7 studies have shown that the polysaccharide material of plant cell walls undergoes phase  
8 separation in the absence of cross-linking stabilizers of the mixed phase. Here we show  
9 experimental evidence that phase separation of the extracellular polysaccharide material  
10 (primexine) during pollen cell development leads to a spatially modulated phase. The spatial  
11 pattern of this phase-separated primexine is also mechanically coupled to the undulation of the  
12 pollen cell membrane. The resulting patterned pools of denser primexine form the negative  
13 template of the ultimate sites of sporopollenin deposition, leading to the final micropattern  
14 observed in the mature pollen. We then present a general physical model of pattern formation via  
15 modulated phases. Using analytical and numerical techniques, we find that most of the pollen  
16 micropatterns observed in biological evolution could result from a physical process of modulated  
17 phases. However, an analysis of the relative rates of transitions from states that are equilibrated  
18 to or from states that are not equilibrated suggests that while equilibrium states of this process  
19 have occurred throughout evolutionary history, there has been no particular evolutionary  
20 selection for symmetric, equilibrated states.

## 21 **Introduction**

22 The diversity and beauty of pollen grain surface patterns have intrigued scientists for  
23 decades, yet no unifying theory has emerged to explain either the pattern formation mechanism  
24 or the function of these surface features (Fig. 1)<sup>1</sup>. So, a natural question is: how do pollen grains  
25 create such diverse, microscale patterns when other cells typically do not? Has there been  
26 evolutionary selection for symmetric patterns, or are these patterns the result of evolutionary drift  
27 of a separate biochemical process? Geometrically similar patterns are found on fungal spores,  
28 mite carapaces, and insect eggs, but these patterns are not nearly as diverse as those found on  
29 pollen<sup>2</sup>. The multitude of pollen patterns observed in nature, along with a complex extracellular  
30 composition, make understanding pollen development particularly difficult. Our objective is to  
31 provide a unified conceptual framework for understanding the patterning process.

32 In mature pollen, the outermost layer of the extracellular material is highly patterned and  
33 called the exine. The exine is a chemically and physically robust outer wall made of  
34 sporopollenin, a complex, highly resistant chemical whose structure and composition are not  
35 fully described<sup>3</sup>. Apart from the structure of the exine itself, pollen can be patterned with a  
36 varying number and geometric arrangement of apertures, which are regions of the extracellular  
37 material that have a reduced or absent exine and are the sites where the pollen tube emerges  
38 during germination<sup>4</sup>. Apertures also allow the pollen grain to reversibly fold during desiccation  
39 and rehydration<sup>5</sup>.

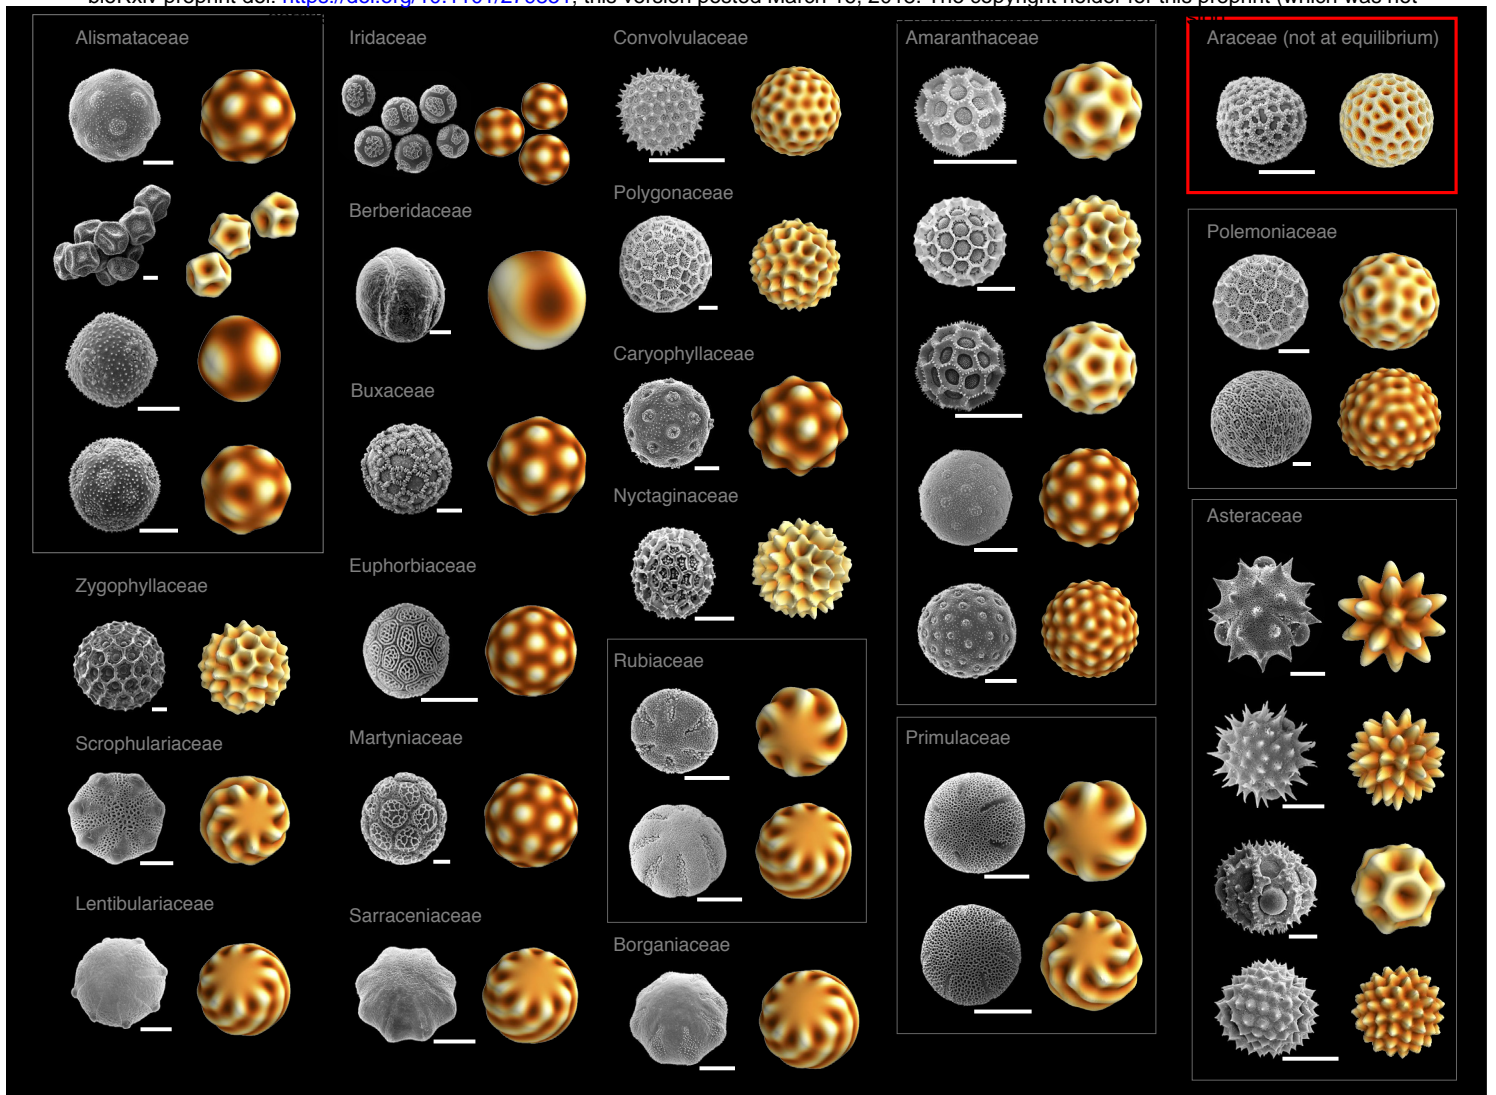

**Figure 1: Pollen SEMs and recapitulated patterns.** Pairs of images illustrate examples of pollen grain surface patterns reproduced with our simulations. These selected pairs represent examples of the range of patterns we found at equilibrium patterns (polygonal spikes, polygonal holes, chiral stripes, and mixtures of these); the red box represents an example of non-equilibrium patterns that are mostly foamy (reticulate). The left image in each pair shows the SEM of a given species, the right image in each pair shows the simulated surface of the same geometry. The species represented and the Hamiltonian parameters ( $l_0, \lambda_3'$ ) producing the matching simulated surface are listed. All SEM micrographs from paldat.org; all equilibrium simulations used  $(R^2\tau)/K=-1$ . **First column:** *Alisma lanceolatum*, (9.5,1); *Caldesia parnassifolia*, (5.5,-1); *Echinodorus cordifolius*, (4.5,1); *Echinodorus quadricostatus*, (7.5,1); *Kallstroemia maxima*, (16.5,-1); *Diascia barberae*, (12.5,0); *Utricularia sandersonii*, (13.5,0). **Second column:** *Iris bucharica*, (6.5,1); *Berberis vulgaris*, (3.5,0); *Sarcococca hookeriana*, (9.5,1); *Phyllanthus sp.*, (11.5,1); *Ibicella lutea*, (11.5,1); *Sarracenia flava*, (13.5,0). **Third column:** *Ipomoea cholulensis*, (19.5,-1); *Persicaria mitis*, (19.5,-1); *Cerastium tomentosum*, (9.5,1); *Bougainvillea sp.* (17.5,-1); *Galium wirtgenii*, (8.5,0); *Galium album*, (13.5,0); *Arnebia pulchra*, (13.5,0). **Fourth column:** *Pfaffia gnaphaloides*, (10,-1); *Gomphrena globosa* (15.5,-1); *Pfaffia tuberosa*, (12,-1); *Amaranthus blitum*, (12.5,1); *Chenopodium album*, (19.5,1); *Primula veris*, (8.5,0); *Primula elatior*, (12.5,0). **Fifth column:** (red box) *Anthurium gracile*, simulated with conserved dynamics [Eq. (7) with  $D=K=1, q_0=1.5, \tau=-20, \lambda_3=-20, \lambda_4=120$ , and a sphere radius of  $R=15$ , for dimensionless parameters  $l_0=22.5, \lambda_3' \approx -27.4, (R^2\tau)/K=-4500$ . We used a Gaussian, random initial  $\psi(\theta, \varphi)$  centered around 0 with a variance of 0.04, and evolved the field until time  $t=2$ ]; *Phlox drummondii*, (16.5,-1); *Polemonium pauciflorum*, (20.5,1); *Gaillardia aristata*, (10,1); *Bidens pilosa*, (14.5,1); *Chondrilla juncea*, (8,-1); and *Iva xanthiifolia*, (19.5,1).

41 The general developmental steps that result in the observed variety of pollen surface  
 42 patterns are well-characterized<sup>6</sup>. The cell wall of the meiotic mother cell fails to completely  
 43 divide, leaving the resulting daughter pollen cells contained within a specialized structure called  
 44 the callose wall, and, as a result, they are isolated from the rest of the anther fluid. The callose  
 45 wall has an unusual composition of  $\beta$ -1,3 glucan, which provides an experimental strategy for its  
 46 selective degradation to access the developing pollen grains<sup>7</sup>. The developing pollen cells then

47 secrete a polysaccharide material called the “primexine” to the cell surface; the primexine  
48 accumulates between the cell’s plasma membrane and the callose wall. The composition of the  
49 primexine is not well-characterized but is likely to be a high molecular weight polysaccharide<sup>8</sup>. It  
50 has been established that the global pattern features of the mature pollen wall (exine) are  
51 somehow templated by the developing primexine layer during this enclosed “tetrad” stage<sup>8,9,10</sup>,  
52 though the physical mechanism of this process remains undescribed. Following this global  
53 templating by the primexine, the callose wall dissolves and sporopollenin is secreted by adjacent  
54 tapetal cells and accumulates on the pollen cell surface, resulting in the patterned exine layer of  
55 mature pollen (Fig. 1).

56 Several studies suggest that pollen apertures may also be features dictated by the  
57 primexine process, especially in multi-aperturate and spiraperturate pollen<sup>11,12</sup>. However, in  
58 pollen grains that contain fewer than six apertures, the aperture pattern may be established by  
59 points of cellular contact between daughter cells during meiosis<sup>13</sup>; since apertures possibly  
60 arising by this mechanism have a tetrad geometry of daughter cells, they are easy to identify, and  
61 we excluded them from this analysis of pattern formation via a primexine template. It is clear  
62 that there is no one unified cell developmental mechanism of aperture formation across plants<sup>11</sup>;  
63 therefore, we adopt the definition that apertures are simply thin regions of the exine material.  
64 Here, we provide a physical explanation for the generation of the templated pattern by the  
65 primexine material.

66 A physical theory for cell surface patterning via a first-order phase transition of material  
67 deposited on the cell surface was recently reported by Lavrentovich and colleagues<sup>14</sup>. Here we  
68 treat the primexine as a phase-separating concentration field on a spherical surface, which in turn  
69 introduces heterogeneities (e.g., a locally varying pressure or preferred curvature) and a local  
70 buckling of the plasma membrane. Such heterogeneities, when coupled to the elasticity of a  
71 membrane, are known to create spatially modulated structures<sup>15</sup>. In pollen, a mechanical  
72 coupling between the polysaccharide matrix and membrane may be promoted by the presence of  
73 the outer callose wall that encapsulates extracellular polysaccharides near the cell membrane  
74 during pattern formation. Initial pattern formation could then occur via a phase transition of the  
75 polysaccharide to a spatially modulated state. The same kind of transition has been used to  
76 describe the formation of viruses<sup>16,17</sup> and two-component vesicles<sup>18,19</sup>, which are also intricately  
77 patterned spherical objects, and discretized versions of such patterned spherical objects have also  
78 been computationally explored<sup>20</sup>. We employ a fully spectral method that allows for a systematic  
79 characterization of pattern configurations.

80 In addition to the pollen pattern formation process being unknown, there has been no  
81 unifying, satisfactory answer to what the functional role of these patterns might be, in spite of  
82 many previous efforts. Some studies have found a correlation between pollinator types and  
83 pollen grain surface features<sup>21</sup>. Other studies have found that there is a general trend of  
84 increasing aperture number in angiosperms<sup>22</sup>. However, the findings of these studies often  
85 conflict, and there is no current consensus as to which features of pollen patterns may be  
86 evolutionarily selected for and why.

87 We show that the preponderance of extant pollen patterns can be explained through a  
88 phase transition of the primexine coupled to the plasma membrane during cell development. We  
89 also show novel experimental corroboration of a densification and pooling of primexine material  
90 leading to membrane undulations at the wavelength of the mature pollen pattern in *Passiflora*  
91 *incarnata*, a species whose exine is reticulate (foamy). This mechanism implies that evolutionary  
92 pattern diversity is to be expected, given the general chemical composition and physical makeup  
93 of the pollen grain during development and that the spherical surface of pollen grains must  
94 accommodate spherical defects in the resulting pattern. Further, most of the ordered states  
95 observed in evolved pollen pattern diversity can be recapitulated with a unique set of parameters  
96 in our theory (Fig. 1). Our theory is also able to account for patterns generated by this physical  
97 mechanism that do not reach an energy minimum (Fig. 1, red box). A surprise in our results is  
98 that the majority of mature, extant pollen patterns do not exist at energy minima within this  
99 pattern formation landscape; there apparently has been no strong evolutionary selection for  
100 symmetry via pattern equilibration in pollen. Finally, we propose a new way of characterizing  
101 pollen patterns motivated by this physical theory that is grounded in the physiology of pollen  
102 development.

103

## 104 **Materials and Methods**

### 105 *Microscopy*

106 *Passiflora incarnata* (Shady Oak Butterfly Farm) was grown at the University of  
107 Pennsylvania Department of Biology greenhouse under a 16 hour/day light cycle at a mean  
108 temperature of 77°F. Fresh anthers were collected, and pollen was immediately dissected out of  
109 the developing anthers within flower buds. To identify the stage of pollen development in a  
110 given anther, one anther from each flower bud was pressed between glass slides and examined  
111 with a brightfield optical microscope; only pollen in the tetrad stage was kept for further  
112 analysis.

113 For transmission electron microscopy (TEM), anthers were first fixed in 3%  
114 glutaraldehyde with 1% alcian blue in 1x phosphate-buffered saline (PBS) for 24 hours<sup>23</sup>, and  
115 then post-fixed in 2% osmium tetroxide for 30 minutes. Next, an ethanol dehydration series was  
116 performed, and samples were embedded in Spurr's resin. Transverse ultrathin sections of 70 nm  
117 were cut with a Diatome diamond knife on a Reichert Ultracut-S microtome. Secondary staining  
118 was done with uranyl acetate and lead citrate. Sections were placed on copper mesh grids and  
119 imaged with a JEOL JEM-1010 electron microscope.

120 For scanning electron microscopy (SEM), we first separated the developing tetrads from  
121 their anthers and then enzymatically removed the callose walls, as described by Kirkpatrick and  
122 Owen<sup>24</sup>. The pollen grains from a single developing flower were placed in 1mL of 0.3% w/v  
123 cellulase, pectolyase and cytohelicase, 1.5% sucrose, and 1% polyvinylpyrrolidone for 2 hours  
124 (Sigma-Aldrich; Milwaukee, MI). Next, the pollen grains were fixed in 3% glutaraldehyde in 1x  
125 PBS for 1 hour. Samples were then washed in deionized water for 5 minutes and placed in  
126 handmade Nitex bags (1 cm<sup>2</sup>); the bags were then heat sealed. The bags with the pollen samples

127 were then submerged in 1x PBS for 5 minutes, followed by an ethanol dehydration series.  
128 Samples were then critical-point dried in CO<sub>2</sub> in a Tousimi Autosamdri-850. The pollen grains  
129 were removed from the bags, placed onto SEM stubs and sputter coated with a ~10 nm thick  
130 layer of gold-palladium using an SPI Module Sputter Coater. We prepared pollen grains at the  
131 same stage without enzymatically removing the callose walls as control for any unintended  
132 effects of the removal procedure. Samples were imaged using a FEI Quanta FEG 250.

133

#### 134 *Primexine composition*

135 Pollen grains at the tetrad stage were also collected to analyze their primexine composition.  
136 We dissected pollen grains from anthers and enzymatically removed the callose walls using the  
137 method described in the section above. The whole pollen grains (without their callose walls)  
138 were then frozen and shipped over dry ice to the Complex Carbohydrate Research Center at the  
139 University of Georgia for a glycosyl composition and linkages analysis. The monosaccharide  
140 composition and linkages analyses were performed by combined gas chromatography/mass  
141 spectrometry of the per-*O*-trimethylsilyl derivatives as described previously by Santander and  
142 colleagues<sup>25</sup>. More details on the method used are in the supplemental information.

143

#### 144 *Theoretical Model*

145 We describe the formation of the pollen surface pattern as a phase separation of the  
146 primexine mechanically coupled to the underlying plasma membrane. It should be noted that we  
147 are not modeling any detailed material properties of the primexine, but we do assume that it is  
148 able to phase separate, similar to mixtures of other high molecular weight extracellular  
149 polysaccharides such as hemicellulose and pectin<sup>26,27</sup>. This model is described in more detail in a  
150 previous study where the effects of thermal fluctuations on patterned states were additionally  
151 considered<sup>14</sup>. The present work focuses on a microscopic model without these fluctuation effects  
152 to study the number, variety, and stability of ordered states (which is much more difficult to do  
153 in the fluctuating case). We will include a brief description here for clarity.

154 Consider a scalar field,  $\psi$ , which represents the concentration field of the primexine  
155 polysaccharides in contact with the outer surface of a pollen grain plasma membrane. We  
156 postulate that the phase separation of this material drives the pattern formation of the pollen  
157 surface. The general Landau-Ginzburg free energy for  $\psi$  is given by

$$\mathcal{H}[\psi] = \int d^2x \left[ \frac{\kappa_0}{2} |\nabla\psi|^2 + \frac{\tau_0}{2} \psi^2 + \frac{\lambda_3}{3!} \psi^3 + \frac{\lambda_4}{4!} \psi^4 \right], \quad (1)$$

158 where  $\kappa_0$  and  $\lambda_{3,4}$  are constants that depend on some undefined primexine chemical or material  
159 properties. We assume that  $\kappa_0, \lambda_4 > 0$ , and  $\tau_0$  is a temperature-like term that is quenched below  
160 some critical value during pattern formation. Because this field sits on a spherical surface, we  
161 use spherical coordinates,  $\psi = \psi(\theta, \phi)$  and our integration measure reads  $\int d^2x = R^2 \int d\theta d\phi$ ,  
162 where  $\theta \in [0, \pi]$  and  $\phi \in [0, 2\pi)$ . We then expand  $\psi(\theta, \phi)$  in terms of spherical harmonics,  
163  $Y_l^m(\theta, \phi)$ :

$$\psi(\theta, \phi) = \sum_{l=0}^{\infty} \sum_{m=-l}^l c_l^m Y_{lm}(\theta, \phi) \equiv \sum_l c_l^m Y_{lm} \quad (2)$$

164 Finally, the expansion coefficients satisfy the property  $[c_l^m]^* = (-1)^m c_l^{-m}$  because the scalar  
165 field  $\psi$  is real.

166 We now follow the infinite flat membrane analogue of our model studied by Leibler and  
167 Andelman<sup>15</sup>. Non-patterned (uniform) states,  $l = 0$  modes, are preferred in Eq (1). However,  
168 when we couple this field,  $\psi$ , to the local membrane curvature, we observe patterned states. The  
169  $l \neq 0$  modes are more energetically favorable in the coupled system since the primexine  
170 concentration on the surface causes the membrane to bend and fluctuate away from a spherical  
171 shape. Details of the implementation of this coupling are described in the work done by  
172 Lavrentovich and colleagues<sup>14</sup>. The salient physical feature of coupling the primexine to the cell  
173 membrane in this study is that a spatially modulated phase with a characteristic mode number  
174  $l_0$  arises, which approximately describes the number of times a given pattern wraps around the  
175 sphere. It is related to the characteristic wavelength,  $\lambda$ , by  $l_0 \approx 2\pi R/\lambda$ . The effective free energy  
176 for the field near  $l \approx l_0$  has the general form

$$\mathcal{H} = \frac{1}{2} \sum_l [K(l - l_0)^2 + R^2\tau] |c_l^m|^2 + \mathcal{H}_{\text{int.}} \quad (3)$$

177 where  $K$  and  $\tau$  are new constants that depend on the material properties of the primexine and  
178 various physical parameters of the plasma membrane such as bending rigidity, surface tension,  
179 elasticity and/or lipid/protein density. These parameters may also incorporate features of the  
180 callose wall if the wall participates in inducing the membrane buckling. The terms in  $\mathcal{H}_{\text{int.}}$  are  
181 inherited from Eq. (1) and involve couplings between different spherical harmonics:

$$\mathcal{H}_{\text{int.}} = \frac{R^2 \lambda_3}{3!} Y_{m_1, m_2, m_3}^{l_1, l_2, l_3} c_{l_1}^{m_1} c_{l_2}^{m_2} c_{l_3}^{m_3} + \frac{R^2 \lambda_4}{4!} Y_{m_1, m_2, \bar{m}}^{l_1, l_2, \bar{l}} Y_{m_3, m_4, -\bar{m}}^{l_3, l_4, \bar{l}} c_{l_1}^{m_1} c_{l_2}^{m_2} c_{l_3}^{m_3} c_{l_4}^{m_4} \quad (4)$$

182 where the  $Y$ s are Gaunt coefficients, with sums implied on all indices. Written in terms of the  
183 Wigner-3j symbols<sup>28</sup>, the Gaunt coefficients are given by

$$Y_{m_1, m_2, m_3}^{l_1, l_2, l_3} \equiv \sqrt{\frac{\prod_{i=1}^3 (2l_i + 1)}{4\pi}} \begin{pmatrix} l_1 & l_2 & l_3 \\ 0 & 0 & 0 \end{pmatrix} \begin{pmatrix} l_1 & l_2 & l_3 \\ m_1 & m_2 & m_3 \end{pmatrix}. \quad (5)$$

185 Rapid evaluation algorithms are available for these symbols<sup>29</sup> that we will use for calculations of  
186 the minimal energy states described below.

187 We choose our units of energy, concentration, and length to reduce the Hamiltonian to  
188 the form

$$\mathcal{H} = \frac{1}{2} \sum_l \left[ (l - l_0)^2 + \frac{R^2\tau}{K} \right] |c_l^m|^2 + \frac{\lambda_3 R}{3! \sqrt{K\lambda_4}} Y_{m_1, m_2, m_3}^{l_1, l_2, l_3} c_{l_1}^{m_1} c_{l_2}^{m_2} c_{l_3}^{m_3} + \frac{1}{4!} Y_{m_1, m_2, \bar{m}}^{l_1, l_2, \bar{l}} Y_{m_3, m_4, -\bar{m}}^{l_3, l_4, \bar{l}} c_{l_1}^{m_1} c_{l_2}^{m_2} c_{l_3}^{m_3} c_{l_4}^{m_4} \quad (6)$$

189 such that we are left with three dimensionless control parameters:  $l_0$ ,  $\lambda_3 R / \sqrt{K \lambda_4}$ , and  $R^2 \tau / K$ .  
190 For notational simplicity, we also set  $\lambda'_3 = \lambda_3 R / \sqrt{K \lambda_4}$ .

191 The ordered (patterned) states are then a linear combination of spherical harmonic basis  
192 states described by Eq. (2), where  $c_l^m$ 's are the complex variables that specify the state. The  
193 spherical harmonics account for the defects in the pattern induced by the spherical topology, as  
194 specified by the Poincaré-Brouwer theorem<sup>30</sup>. We note that because we do not know the precise  
195 composition of the primexine, or the effects of the callose wall or any additional chemistry in the  
196 space between the cell membrane and the callose wall, the parameters of our model are by  
197 necessity phenomenological. However, in principle, with a careful accounting of all the  
198 chemistry of the primexine, plasma membrane, and callose wall, it would be possible to  
199 independently measure the coefficients described above for a given species and pattern. Next, we  
200 describe our method of exploring the phase space of ordered states by finding the set of complex  
201 variables,  $c_l^m$ 's, that describe the global minimum energy state.

202

### 203 *Phase Diagram Exploration*

204 We used simulated annealing (SA) and gradient descent (GD) methods as outlined in  
205 *Numerical Recipes*<sup>31</sup> to solve for the minimum energy states of the Hamiltonian in Eq. (6). For  
206 simplicity and analytic tractability, we used a single-mode approximation in which we consider  
207 patterns at either 1) single  $l$  values where  $l = l_0$  or 2) the mixing of two adjacent integer values  $l$   
208 and  $l + 1$  for intermediate values of  $l_0$  between  $l$  and  $l + 1$ . We also make some comments on  
209 the more general case where we consider the dynamics of the pattern formation.

210 Since this free energy may potentially have many local minima for a single set of  
211 parameters, we used SA to find the global minimum energy state. In this search algorithm, a  
212 Metropolis criterion is used in which lower energy states in the phase space are always accepted,  
213 while higher energy states are accepted with a Boltzmann probability distribution,  $P \propto e^{-\Delta E / T}$ ,  
214 given a temperature-like parameter  $T$ . The parameter  $T$  was tuned to allow the system to escape  
215 local minima. Initially,  $T$  was chosen to be large enough to allow for an exploration of the whole  
216 phase space;  $T$  was then lowered with a particular annealing schedule such that the system  
217 settled into its global minimum as  $T$  became small<sup>31</sup>.

218 To find the appropriate annealing schedule and number of iterations per temperature  
219 value, we ran SA enough times to find consistent minimum function values at a given set of  
220 parameter values for  $l_0$  and  $\lambda'_3$ . We found that an optimal annealing run started with  $T = 1$  and  
221 an initial temperature step of  $\Delta T = 0.1$ . Once we reached a temperature of  $T = \Delta T$ , we  
222 decreased our step size  $\Delta T$  by a factor of 10. We continued decreasing the temperature in these  
223 incrementally smaller amounts until the observed pattern no longer changed appreciably with  
224 further annealing.

225 We also used GD to ensure that the SA reliably located the global energy minimum for a  
226 given parameter set and to test for the presence of local minima. GD is an algorithm that  
227 minimizes functions by iteratively moving in the negative direction of the function's gradient



228 until a point with a gradient of zero is found. We were able to calculate the gradient analytically  
229 for our model, giving us a substantial computational speed increase.

230 To confirm the stability of the global minima found via both SA and GD, we  
231 diagonalized the Hessian (matrix of second derivatives) and confirmed that all eigenvalues are  
232 positive, with the exception of three zero eigenvalues corresponding to the rotations of the  
233 sphere. We then comprehensively explored the phase space using both SA and GD by  
234 systematically changing the parameter values,  $l_0$  and  $\lambda'_3$ , and recording the effects of those  
235 changes to the pattern on the sphere surface. We set  $R^2\tau/K = -1$  in this exploration of the  
236 phase space to remain in the ordered state, since increasing  $R^2\tau/K$  would induce a transition to  
237 the unpatterned state.

238 To study the dynamics of our model, we supposed that the total volume of the primexine  
239 condensed and dilute phases are fixed. Therefore, we would generally expect to find a conserved  
240 dynamics for our energy. Such a dynamics, consistent with the idea that the free energy is  
241 minimized by a spatial modulation with a characteristic wave number  $q_0 \equiv 2\pi/\lambda$ , is given by

$$\partial_t \psi(\mathbf{x}, t) = D \nabla^2 \frac{\delta \mathcal{H}}{\delta \psi} = D \nabla^2 \left[ K (\nabla^2 + q_0^2)^2 \psi + \tau \psi + \frac{\lambda_3}{2} \psi^2 + \frac{\lambda_4}{6} \psi^3 \right] \quad (7)$$

242 where we have slightly modified the gradient term in order to more easily integrate the equation  
243 of motion. This particular equation of motion is also called the phase-field crystal model<sup>32</sup>. We  
244 integrated Eq. (7) using the FiPy package<sup>33</sup>, a finite volume solver. Unlike our spherical  
245 harmonic method described above, this technique discretizes the sphere and does not preserve  
246 rotational symmetry. In addition, we made the wavelength selection weak (i.e., allowed more  
247 states away from the characteristic wavelength to contribute to the final pattern) by evolving with  
248  $\tau, \lambda_{3,4} \gg K$ . For a 2D flat geometry, foamy states are expected<sup>34</sup>, and we expect a similar  
249 phenomenology on the sphere.

250

### 251 *Evolutionary trait reconstruction*

252 To examine whether any physical features described by our model of pollen have  
253 undergone evolutionary selection, we performed an evolutionary trait reconstruction and  
254 subsequent analysis for relative rates of evolution between pattern types across spermatophytes  
255 (seed-bearing plants). We first constructed a morphological data set for pollen surface patterns of  
256 2,641 species representing 203 families using the palynology database PalDat<sup>35</sup>. To define a  
257 tractable dataset, we limited our morphological analysis to pollen monads, though our theory is  
258 potentially general enough to describe any cells of spherical topology.

259 We restricted our analysis to patterns whose development is commensurate with the  
260 underlying assumptions of our model; in order to include a species, we required positive  
261 documentation that during the tetrad stage, a given species exhibits plasma membrane  
262 undulations with the same wavelength as the mature surface pattern. These data were gathered in  
263 a comprehensive review of pollen development literature (see supplemental references). We  
264 excluded from our analysis any surface features that demonstrably arise after the dissolution of  
265 the callose wall (for example, most echinate spines are derived from tapetal fatty acid

266 deposition)<sup>36</sup>. In these cases, we ignore the post-callose-wall features and analyze the pollen  
267 grain as if it did not have them.

268 We first separated all relevant PalDat SEM images into one of two categories: final  
269 pattern is an equilibrium state (i.e., the observed pattern corresponded to an energy minimum  
270 from our theory) and final pattern is not at an equilibrium state (i.e., the observed pattern did not  
271 correspond to an energy minimum calculated from our theory; instead it was either uniform or  
272 foamy). We then measured pollen pattern wavelengths manually in ImageJ. The patterns at  
273 equilibrium could be identified as those with surface features with a characteristic (constant)  
274 wavelength. All families with patterns in an equilibrium state also had wavelengths  $>3\ \mu\text{m}$ ,  
275 except for some species in the family Amaranthaceae, which had wavelengths of  $1\text{--}3\ \mu\text{m}$ .  
276 Conversely, patterns not at equilibrium will not demonstrate a single, constant pattern  
277 wavelength but will show a range of wavelengths. Next, we further characterized patterns not at  
278 equilibrium into three bins organized by their average pattern wavelength value:  $\lambda < 1\ \mu\text{m}$ ,  
279  $1 < \lambda < 3\ \mu\text{m}$ , and  $\lambda > 3\ \mu\text{m}$ . Thus, we had four categories to describe pollen from a given family: (1)  
280 pattern at equilibrium,  $\lambda > 3\ \mu\text{m}$  (2) pattern not at equilibrium,  $\lambda < 1\ \mu\text{m}$ , (3) pattern not at  
281 equilibrium,  $1 < \lambda < 3\ \mu\text{m}$ , (4) pattern not at equilibrium,  $\lambda > 3\ \mu\text{m}$ . Although most equilibrium  
282 patterns were formed by exine features, we also considered features previously defined as  
283 apertures (i.e., thin regions in the exine) with distinct characteristic wavelengths as equilibrium  
284 states. We ignored apertures in a tetrahedral arrangement since these features plausibly result  
285 from the geometry of meiosis rather than from the primexine<sup>11</sup>; we analyzed these pollen grains  
286 as though the apertures were absent. The observed states not at equilibrium were often foamy  
287 (reticulate) with a range of wavelengths. The smallest wavelength category ( $\lambda < 1\ \mu\text{m}$ ) includes  
288 smooth-surfaced pollen.

289 We used a time-calibrated family-level phylogenetic tree of spermatophytes<sup>37</sup> identified  
290 in the integrated Tree of Life (iTOL) database<sup>38</sup> to estimate the evolutionary history of these  
291 pollen pattern categories. We assigned states to the terminal nodes representing spermatophyte  
292 families according to the pattern categories described above; the number of states present in a  
293 single family ranged from one to the maximum of four. The Nexus file describing this tree and a  
294 fully detailed tree figure are available in the supplemental data.

295 We used ancestral reconstruction, as implemented in BayesTraits<sup>39</sup> to study the character  
296 evolution of patterned states. We used a maximum likelihood algorithm and the multistate  
297 model of evolution<sup>40</sup>. We first tested the hypothesis that there is directional evolution either to or  
298 from pollen patterns at equilibrium to those that are not at equilibrium. To do this, we defined  
299 state A to be category (1), or “at equilibrium,” and state B to be categories (2)–(4), or “not at  
300 equilibrium”. This model is called the “2-state equilibrium model”.

301 We also tested whether there was directional selection for larger pattern wavelengths and  
302 therefore more distinctly patterned, polygonal pollen over evolutionary time. For this test, we  
303 defined three states (C, D, and E), one for each of the three wavelength categories described  
304 above. State C included categories (1) and (2) for all patterns with  $\lambda > 3\ \mu\text{m}$ . State D included all  
305 patterns in category (3) not at equilibrium patterns,  $1 < \lambda < 3\ \mu\text{m}$ . State E included all patterns in

306 category (4) not at equilibrium patterns,  $\lambda < 1 \mu\text{m}$ . This model is called the “3-state wavelength  
307 model”.

## 308 **Results**

### 309 *Microscopy*

310 We divided the developmental trajectory of pollen in the tetrad state into six distinct  
311 stages. In the first stage, after meiosis but before primexine secretion, the plasma membrane did  
312 not undulate, there was little or no extracellular material present, and the cell surface was smooth  
313 over length scales of about a micron (Fig. 2, col. 1). In the second stage, we observed the  
314 primexine material appear on the cell surface (Fig. 2, col. 2, arrowhead). This material was  
315 initially uniform in electron density, and the plasma membrane underneath became more  
316 irregular, apparently in response to the presence of the material on the cell surface, but there was  
317 not a characteristic wavelength in the membrane; the SEM of this developmental stage shows the  
318 appearance of a dough-like material on the surface of the cell (Fig. 2, col. 2). In the third stage,  
319 the primexine began developing heterogeneities in electron density, and the corresponding SEM  
320 showed clumping of the surface material into regions of  $\sim 0.5 \mu\text{m}$  in width, but there was still no  
321 characteristic wavelength in the membrane undulation (Fig. 2, col. 3). In the fourth stage, the  
322 primexine heterogeneities became more pronounced and the plasma membrane began to  
323 undulate with a characteristic wavelength; the SEM at this stage shows distinct domains of  
324 separated primexine material on the cell surface with regions of positive curvature separating  
325 these domains (Fig. 2, col. 4).

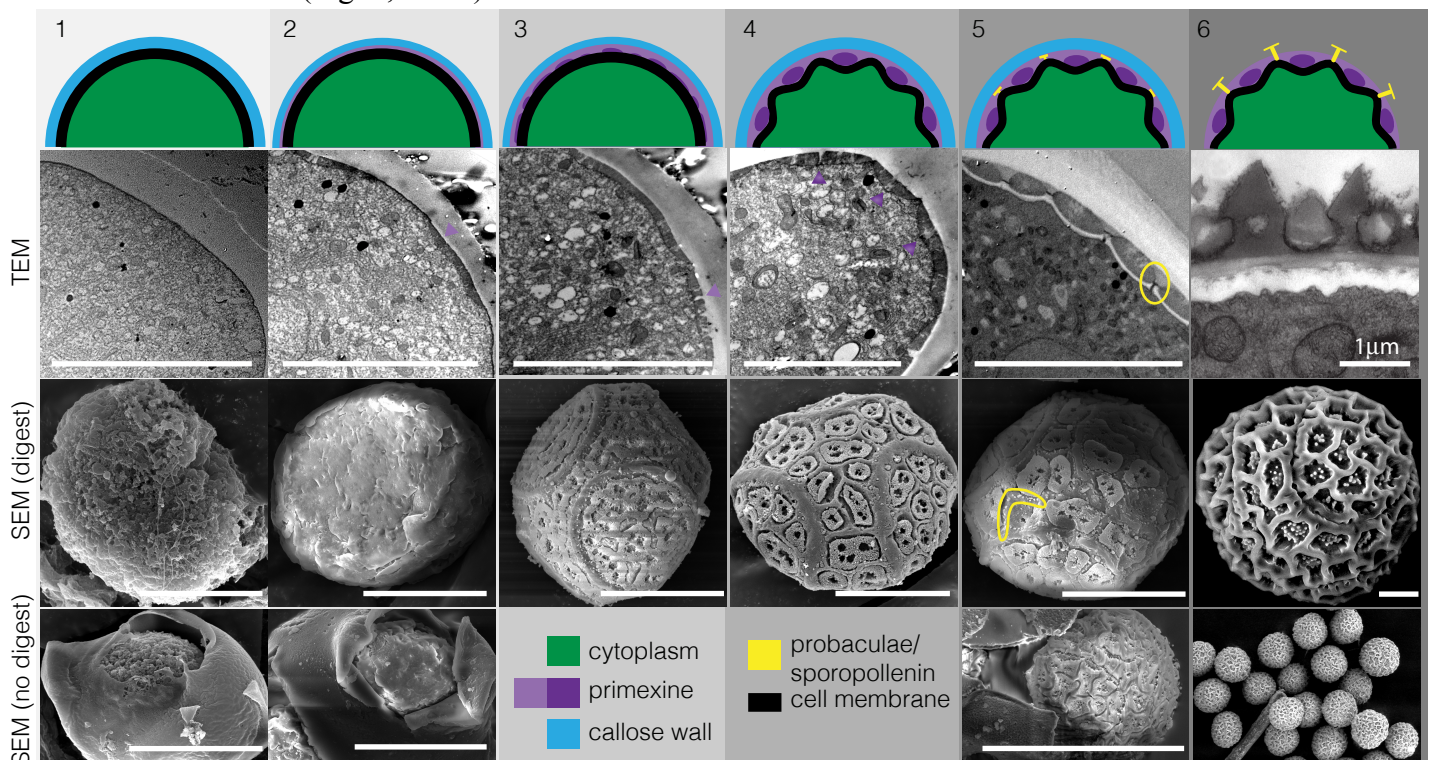

**Figure 2:** *Passiflora incarnata* primexine phase separation. We define five developmental steps of pattern formation occurring after meiosis and prior to callose wall dissolution; the sixth step represents mature pollen. Development proceeds left to right. The first row contains a schematic representation of each step. The second row shows TEM images, the third row shows SEM images with the callose wall enzymatically removed, and the fourth row shows SEM images where the callose wall was mechanically opened but not enzymatically removed. In general, the surface of developing pollen is similar whether the callose wall was removed enzymatically or mechanically. Arrowheads in column 2 indicate the location of the primexine on the cell membrane surface. Arrowheads in columns 4 and 5 indicate the location of dense primexine that causes the cell membrane to locally curve. The circle in column 5 highlights initial formation of probacula/sites of sporopollenin deposition. All scale bars represent  $10 \mu\text{m}$ .

326 In the fifth stage, the phase separation of primexine was complete, with two  
327 geometrically regular materials of distinctly different density in contact with the cell  
328 membrane. Electron-dense domains (condensed phase) were located on top of regions of  
329 negative membrane curvature, and were surrounded by a less electron-dense phase (dilute phase)  
330 associated with regions of positive membrane curvature (Fig. 2, col. 5). After primexine phase  
331 separation was completed, probacula (sites of sporopollenin accumulation) began forming on the  
332 plasma membrane, between electron-dense regions of primexine material and on regions of  
333 positive membrane curvature (Fig. 2, col. 5, circled). A dilute phase of primexine can also be  
334 observed between the pools of the denser phase in an image of tetrad pollen with a broken  
335 callose wall but no enzymatic digestion (Fig. 2, col. 5). The final, sixth stage shows the mature  
336 pollen grain with the exine fully deposited onto the patterned primexine; the final exine pattern is  
337 formed from the template of low-density primexine material formed during phase separation  
338 (Fig. 2, col. 6). While the cytoskeleton is visible in regions of our TEM images, there was no  
339 apparent spatial correlation between the location or organization of cytoskeletal elements and the  
340 development of membrane undulations, or to the final observed pollen pattern.

341

#### 342 *Primexine composition*

343 The glycosyl composition and linkage analysis of primexine material prepared from  
344 developing *Passiflora incarnata* pollen showed a polysaccharide material formed from linkages  
345 of a complex mixture of monosaccharides. Given the small amount of material (112.2  $\mu\text{g}$ ) we  
346 were able to isolate, it was not possible to characterize in detail the chemical structure of the  
347 original primexine material. Signal to noise in this analysis was further degraded due to the fact  
348 that whole cells were analyzed, such that  $\sim 95\%$  of the total residues present were unlinked  
349 glucose monomers, and therefore very likely from the cytoplasmic energy stores, not the  
350 extracellular matrix. The remaining 5% of residues represented a wide variety of  
351 monosaccharides. Several residues, notably galactose (Gal) and mannose (Man), were linked at  
352 multiple sites within the monosaccharide, suggesting that the parent material was highly  
353 branched. Therefore, after normalizing for glucose content, the constituent monosaccharides and  
354 their linkages present during pollen pattern formation were broadly consistent with a mixture of  
355 highly branched cellulose, pectin, and hemicellulose-like polymers. The full analysis is available  
356 in the supplemental data.

357

#### 358 *Phase Diagram Exploration*

359 To better understand the landscape of patterns generated by this physical mechanism, we  
360 explored the equilibrium phase space of the effective Hamiltonian in Eq. (6) by finding the  
361 minimum energy states for a range of parameter values. A rich pattern space resulted just from  
362 tuning the two dimensionless parameters  $l_0$  and  $\lambda_3'$  and setting  $R^2\tau/K = -1$ . Much of this  
363 phase space was comprised of patterns with spikes and holes in various polyhedral arrangements;  
364 several examples are shown in Figure 3. We found that these patterns could often be categorized  
365 into one of three general symmetric types: regular and modified polyhedral spikes; their inverses

366 (duals), in which the spikes become holes; and chiral stripes (Fig. 3). Chiral stripes were only  
367 observed when  $\lambda'_3 = 0$  and  $l_0$  was a half integer value (consistent with observations by Sigrist  
368 and Matthews)<sup>41</sup>. Chiral stripes have parity symmetry with two chiralities that are energetically  
369 degenerate; this degeneracy may be broken by higher-order chiral terms as shown by  
370 Dharmavaram and colleagues, thereby biasing a single chirality<sup>17</sup>. These higher-order terms may  
371 also plausibly generate the more straight stripes observed in the pollen grains. When this  
372 categorization of simple polyhedra or chiral stripes did not apply, the pattern typically  
373 represented a mixture of two simpler polyhedral types and/or chiral stripes. Note that for  $l = l_0$   
374 states with odd  $l_0$ , the Gaunt coefficient in front of  $\lambda'_3$  vanishes, so the pattern has no  $\lambda'_3$   
375 dependence in that case. For even values of  $l_0$ , the sign of  $\lambda'_3$  determined whether the pattern  
376 consisted of spikes or holes. At  $\lambda'_3 = 0$ , the spike and hole patterns are degenerate due to the  
377  $\psi \rightarrow -\psi$  symmetry in the energy. We found that in some regions, the phase space had  
378 boundaries across which discontinuous pattern changes were observed (solid lines in Fig. 3). In  
379 other regions, patterns gradually changed with systematic tuning of parameters (Fig. 3). We note  
380 that we were interested in the broad features of the phase diagram, not the specific characteristics  
381 of the phase transitions between patterned states, such as how their continuous or discontinuous  
382 nature might change if we include, for example, thermal fluctuations<sup>14,42</sup> or contributions from  
383 modes away from  $l = l_0$ . Finally, we note that in our analysis we found that local minimum  
384 states for a given parameter set could match the global minimum state for a separate parameter  
385 set (corresponding to areas of coexistence). The occurrence and complexity of these global and  
386 local minima is in marked contrast to the planar geometry, where just three stable patterns are  
387 observed regardless of the pattern wavelength: uniform stripes, hexagons, or inverted  
388 hexagons<sup>43</sup>. Our results are intuitive because on a sphere, none of these three planar patterns can  
389 fully wrap the sphere without introducing defects (e.g, pentagonal arrangements of holes and  
390 spikes, or points where the stripes collide or end); the many possibilities for accommodating  
391 defects yield more possibilities for producing minima in the free energy, as observed in the  
392 complexity we find in our phase diagram.

393 In studying the dynamics of our model, we found that conserved dynamics indeed yield  
394 foamy structures at finite times, as expected from the flat 2d geometry case<sup>34</sup> (Fig. 1, red box).  
395 These structures are not identical when different initial conditions are used, so we would  
396 generally expect a range of disordered structures in pollen grains of a given non-equilibrating  
397 species. We corroborate this prediction with a field of pollen from a single species (*Passiflora*  
398 *incarnata*), which demonstrates that different foamy pollen grains of the same species are  
399 slightly different, with a distribution of similar wavelengths comprising the overall reticulate  
400 pattern (Fig. 2, col. 5).

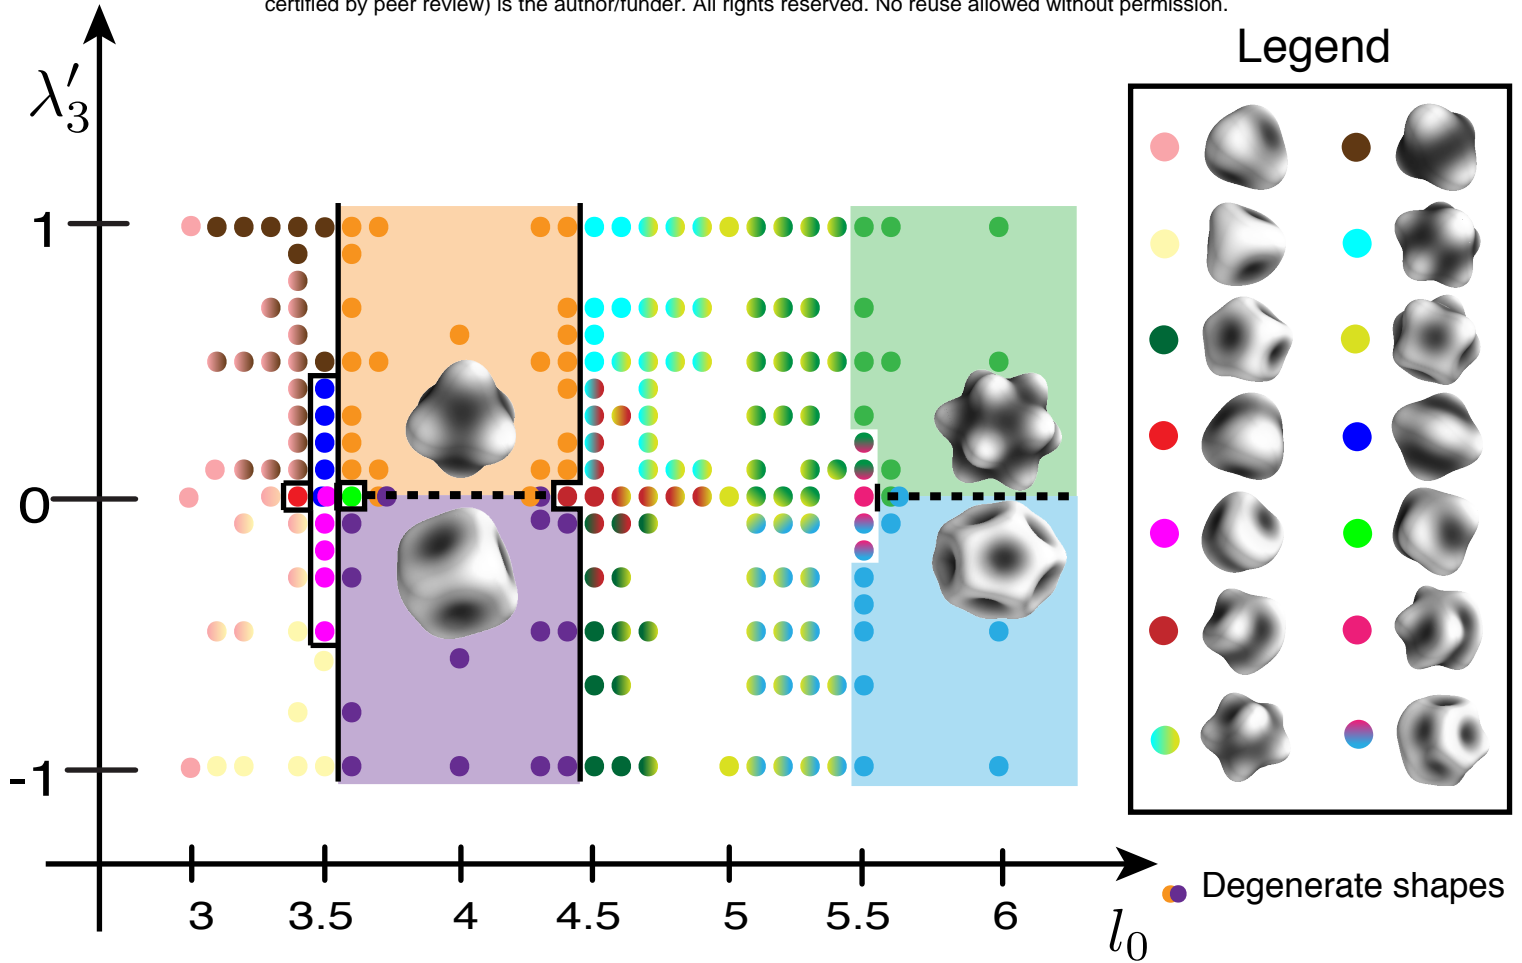

**Figure 3: Phase Diagram of Simulations at Equilibrium.** Calculated energy minima in the  $(l_0, \lambda'_3)$  plane at equilibrium (Eq. 6). Each calculated point is color-coded according to the geometry of the minimum energy state found at that point in the space. Chiral stripe geometry is found at equilibrium when  $l_0$  is a half integer and  $\lambda'_3=0$ . The rest of the space contains polyhedral spike patterns and their inverses. The boundaries between distinct pattern geometries are indicated by black lines. For example, there is a boundary line between  $l_0=3.5$  and  $l_0=3.6$  from  $\lambda'_3=0.1$  to  $\lambda'_3=1.0$  across which we observe a discontinuous change in the pattern formed at equilibrium. In contrast, in other regions of the diagram, such as between  $l_0=4.5$  and  $l_0=5.5$  for  $\lambda'_3=1.0$ , there is a gradual transition in geometry from one minimum energy state to the next without a distinct boundary line. The legend shows the geometric patterns that correspond to a given color in the phase space. Overlapping dots represent degenerate states. Dots with a gradient of two colors represent intermediate states that are mixtures between two states. Colored shading represents large regions of the space with a single symmetrical pattern.

#### 401 *Evolutionary Trait Reconstruction*

402 We matched patterns generated by our theory to those observed in a pollen database;  
 403 when we restricted our analysis to monads with documented membrane undulation during  
 404 development, our dataset represented  $\sim 45\%$  of the 453 described families in Sporophyta. This is  
 405 a minimum set of families potentially described by our theory, since not all families have  
 406 described pollen and our theory also likely applies to non-monad pollen. This analysis showed  
 407 that only 27 of 202 included families contain species whose pollen patterns are consistent with  
 408 an equilibrium state (Fig. 4). Only seven of those 27 families contain species with pollen patterns  
 409 solely in equilibrium states. The remaining 175 families consist of species exhibiting only non-  
 410 equilibrated patterns. We found that equilibrium patterns are present throughout angiosperms,

411 including in gymnosperms, monocots, and eudicots. Notably, equilibrium patterns were absent  
 412 from the Magnoliids and five other basal families with intermediate branch order between  
 413 gymnosperms and angiosperms. In gymnosperms, only Welwitschiaceae and Ephedraceae had  
 414 species with equilibrium pattern states, and both patterns were striped. In monocots, Araceae and  
 415 Iridaceae had some species with equilibrium patterns, consisting of stripes and polyhedral tiling,  
 416 respectively. All species in the family Alismataceae had an equilibrium pattern with a polyhedral  
 417 distribution of pore-like apertures. The rest of the families with some equilibrium states were  
 418 found in eudicots; their surface patterns were **stripes** (Rubiaceae, Boraginaceae,  
 419 Scrophulariaceae, Sarraceniaceae, Primulaceae, Lentibulariaceae, Polygalaceae, Acanthaceae,  
 420 Berberidaceae), **polyhedral spikes** (Asteraceae, Zygophyllaceae, Amaranthaceae,  
 421 Cucurbitaceae, Alismataceae, Cactaceae, Convolvulaceae, Caryophyllaceae, Polygonaceae,  
 422 Buxaceae, Polemoniaceae, Martyniaceae, Euphorbiaceae), and **polyhedral holes**  
 423 (Polemoniaceae, Buxaceae, Polygonaceae, Convolvulaceae, Nyctaginaceae, Zygophyllaceae).  
 424 Some families had both polyhedral spike and polyhedral hole patterns because the polyhedral  
 425 arrangement of their apertures fit into a larger exine pattern (see Fig. 1, Convolvulaceae). Of  
 426 these, only four families contained species with only equilibrated patterns: Polygalaceae,  
 427 Amaranthaceae, Nyctaginaceae, and Martyniaceae. Examples of each of the pattern types can be  
 428 found in Figure 1 and the supplemental information.

429 **Table 1: Model Rates and Probabilities**

| Model                          | No. rates | $-\ln L$  | Transition rates                                        | Probability of root state                | States                                                                                        |
|--------------------------------|-----------|-----------|---------------------------------------------------------|------------------------------------------|-----------------------------------------------------------------------------------------------|
| 2-state eq. model              | 2         | 31.850555 | qAB = 94.0<br>qBA = 4.48                                | P(A)=0.500<br>P(B)=0.500                 | A: at eq.<br>B: not at eq.                                                                    |
| Null model for eq. model       | 1         | 34.454052 | qAB=qBA<br>=0.235                                       | P(A)=0.997<br>P(B)=0.00285               |                                                                                               |
| 3-state $\lambda$ model        | 6         | 125.18975 | qED=29.7 qEC=0<br>qDE=68.1 qDC=23.2,<br>qCE=58.8, qCD=0 | P(C)=P(D)<br>=P(E)=0.333                 |                                                                                               |
| Coarser/finer $\lambda$ model  | 2         | 125.39324 | qED=qEC=qDC=22.2,<br>qDE=qCE=qCD=100                    | P(C)=P(D)<br>=P(E)=0.333                 | C: $\lambda > 3\mu\text{m}$<br>D: $1 > \lambda > 3\mu\text{m}$<br>E: $\lambda < 1\mu\text{m}$ |
| Null model for $\lambda$ model | 1         | 137.01527 | qED=qEC=qDC=qDE=qC<br>E=qCD=0.942                       | P(C)=0.135,<br>P(D)=0.111,<br>P(E)=0.754 |                                                                                               |

430 **Table 2: Hypothesis Tests**

| Models compared                    | Likelihood ratio | DOF | p-value    | Kept model        |
|------------------------------------|------------------|-----|------------|-------------------|
| 2-state eq. vs null                | 5.21             | 1   | 0.05-0.01  | 2-state eq.       |
| 3-state $\lambda$ vs null          | 23.7             | 5   | $\ll 0.01$ | 3-state $\lambda$ |
| 3-state $\lambda$ vs coarser/finer | 0.407            | 4   | 0.99-0.95  | coarser/finer     |

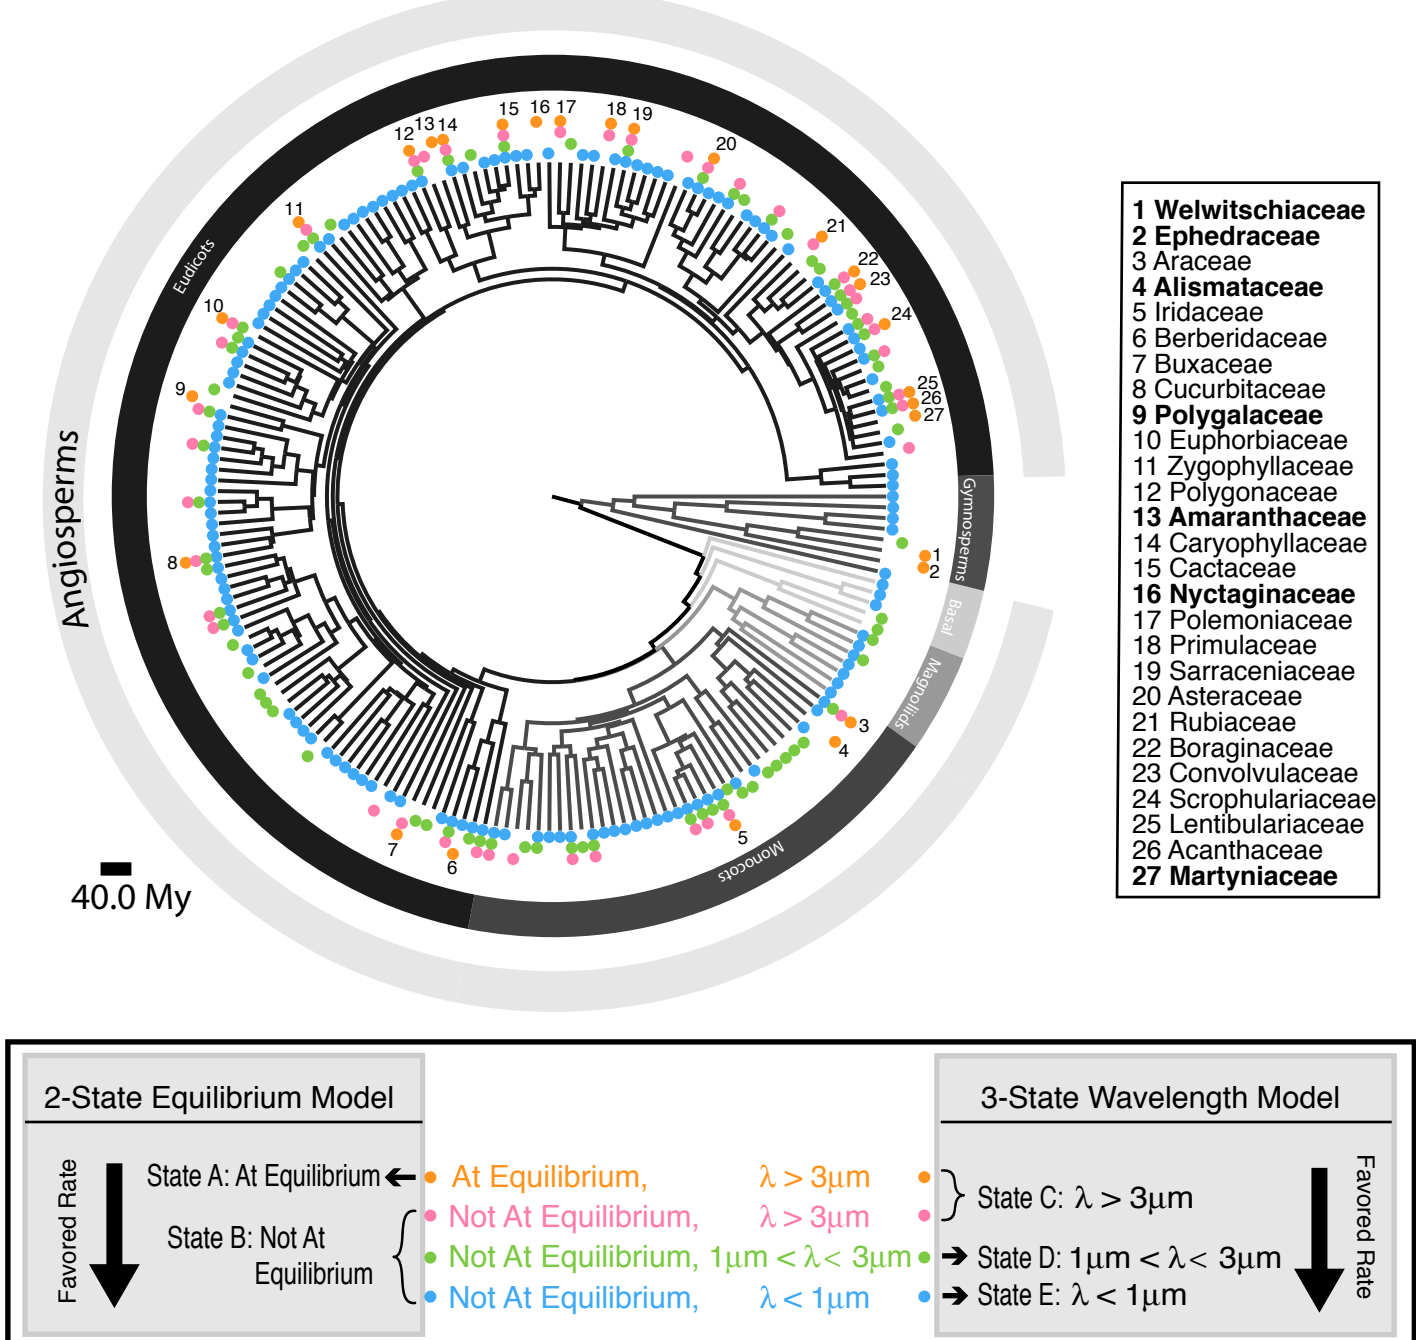

**Figure 4: Angiosperm Phylogenetic Tree with Character States. Top panel:** Phylogenetic tree of spermatophytes with 202 families at terminal taxa. Colored dot represent the character states of the species within each family. Each terminal taxon is labeled with up to four states. The numbered families (27 in total) are those that have species that are in an equilibrium states. The families listed in black have more than one state; families listed in bold (seven of the 27) only have species that are in an equilibrium state. **Bottom panel:** legend for tree and description of categorization of states for two evolutionary models tested. We find that the favored rates are towards not at equilibrium patterns and smaller wavelengths. The scale bar represents 40.0 million years.



433 We initially hypothesized that if different pollen patterns served different  
434 ecophysiological functions, evolution would select for patterns that reach equilibrium during  
435 development, since this is presumably a more developmentally predictable and replicable state.  
436 We tested this hypothesis using two models of ancestral state reconstruction: a 2-state  
437 equilibrium model and a 3-state wavelength model. In the 2-state equilibrium model, we binned  
438 our four identified pattern categories of wavelength and equilibrium (see methods) into two  
439 evolutionary states, A and B, such that state A is all patterns at equilibrium and state B is all  
440 patterns not at equilibrium (Fig. 4, bottom panel). The log-likelihood ratio of the 2-state  
441 equilibrium model compared to the null model (where both rates are equal) was 5.21, so with one  
442 degree of freedom, the p-value was between 0.01 and 0.05 (Table 2). We therefore reject the null  
443 model and find that the rate of evolutionary transition from equilibrium to non-equilibrium  
444 patterns is ~20-fold greater than the reverse rate (Table 1,  $q_{AB}=94.0$ ,  $q_{BA} = 4.48$ ). We also  
445 found that the state at the root of spermatophytes had equal probability of being at equilibrium or  
446 non-equilibrium.

447 We then tested the 3-state wavelength model by re-sorting categories (1)–(4) so that state  
448 C represented all patterns with wavelengths greater than 3  $\mu\text{m}$ , state D represented patterns with  
449 wavelengths between 1 and 3  $\mu\text{m}$ , and state E represented patterns with wavelengths less than 1  
450  $\mu\text{m}$  (see methods and Fig. 4, bottom panel). We first compared the 3-state wavelength model to  
451 the null model and found a likelihood ratio of 23.7 given five degrees of freedom, for a p-value  
452  $\ll 0.01$ . Therefore, we reject the null hypothesis and accept the 3-state wavelength model. We  
453 next compared the 3-state wavelength model with a simpler coarser/finer model where we  
454 restricted all rates towards larger wavelengths (coarser) to be equal to each other (Table 1,  
455  $q_{ED}=q_{EC}=q_{DC}$ ) and all rates towards smaller wavelengths (finer) to be equal to each other  
456 (Table 1,  $q_{DE}=q_{CE}=q_{CD}$ ). The likelihood ratio between these two models resulted in a p-value  
457 between 0.99 and 0.95, such that there was no significant difference between them. It is  
458 therefore likely to be the case that pollen evolves more rapidly from equilibrated polygonal  
459 patterns to finely reticulated or bumpy patterns than the reverse, and that any more complicated  
460 model of pattern type evolution will be over fit. In other words, evolution seems to favor pollen  
461 that never reaches equilibrated patterns, and similarly, foamy (reticulate) or unpatterned pollen  
462 seems favored over the more interesting-to-humans pollen with well-defined polygonal patterns.

463

## 464 **Discussion**

465 We observed that both the electron density and the surface distribution of the primexine of  
466 *Passiflora incarnata* change, becoming inhomogeneous, during pattern development. Because  
467 the primexine electron density is initially uniform but subsequently separates into two distinct  
468 electron densities, primexine development is consistent with a phase separation into a dense and  
469 a dilute phase. The phase transition of polysaccharide materials of this kind is expected in the  
470 absence of cross-linking factors (perhaps, for example, into phases with more- and less-branched  
471 polymers). Additionally, we observed that the denser phase correlates to the plasma membrane  
472 undulations (with discrete patches of dense material sitting inside the dips in the membrane).

473 Therefore, our data suggest that the more dense primexine regions cause the plasma membrane  
474 to curve away from its initially featureless, spherical shape. The final pollen exine pattern is then  
475 negatively templated by the pooled dense primexine and correlated membrane curvature.

476 A previous study of *Brassica campestris* pollen, another reticulate species, also demonstrated  
477 the same deposition of primexine on the plasma membrane surface<sup>44</sup> followed by plasma  
478 membrane undulations correlated to a dense primexine phase. In addition to the many reticulate  
479 species whose patterns seem to be templated by plasma membrane undulations, species with  
480 other surface patterns such as the polygonal holes of *Ipomoea purpureae*<sup>45</sup> or the polygonal  
481 spikes of *Farfugium japonicum*<sup>46</sup> also exhibit early membrane undulations at the same  
482 wavelength as the mature pattern features. However, primexine was not preserved in these  
483 studies<sup>23</sup>.

484 Although we were unable to determine the exact chemical composition of the primexine, the  
485 constituent monosaccharides and their linkages are consistent with a mixture of cellulose, pectin-  
486 and hemicellulose-like polysaccharides. Mixtures of different polysaccharides tend to phase  
487 separate unless a cross-linker actively prevents them from demixing<sup>26</sup>, such that phase separation  
488 of primexine material on the surface of a developing pollen cell is perhaps not surprising.

489 Our theory shows that this phase separation of a material on the surface of a spherical cell,  
490 when coupled to membrane elasticity (i.e., membrane buckling), yields an effective free energy  
491 that exhibits spatially modulated phases. This effective free energy, using both single-mode and  
492 two-mode approximations, produced equilibrium states corresponding to a variety of spikes,  
493 holes, and chiral stripes on the surface of a sphere. These equilibrium patterns generated by our  
494 theory also correspond to about ten percent of the pollen patterns documented in PalDat. We  
495 expect that other highly ordered, patterned pollen may also fit our model when we include more  
496 modes.

497 The more disorganized patterns observed in ~90% of analyzed species may be explained  
498 by the dynamics of the process encoded by our model. Indeed, if we arrest the dynamics after  
499 some short time (before equilibrium can occur), we find states that resemble the foamy, more  
500 disordered pollen structures. In the planar case, some of these foamy structures may even be  
501 relatively stable, as discussed in more detail by Guttenberg and colleagues<sup>34</sup>. Applying the  
502 techniques in this work to the surface of a sphere would be an interesting topic for future  
503 research.

504 Given the observation of so many species that either have a non-equilibrated pattern, or  
505 no pattern at all, it is worth thinking about what this means in the context of our general physical  
506 theory. One possibility is that most plant materials have effective free energy parameters that  
507 barely favor phase separation of the primexine. This possibility would explain both the repeated  
508 evolution of featureless pollen and the high abundance of disordered structures, both of which  
509 could result from the slower kinetics and enhanced fluctuations that one would generally expect  
510 near a phase transition, especially if the phase transition has only a weakly discontinuous  
511 character. In mixtures that start near such a critical point, small variations of the parameters  
512 (induced, for example, by small changes in chemical composition of the primexine) could induce  
513 large changes in the patterning. This possibility might lend additional weight to our physical  
514 theory as an explanation of the observed pattern diversity; small evolutionary shifts in primexine

515 composition could fundamentally alter the mature pollen pattern, leading to the relatively large  
516 shifts in pollen patterns in short periods of time that have demonstrably occurred in evolution.  
517 Although we did not detect an elevated rate of appearance of equilibrium patterns, the tree is  
518 consistent with many instances of equilibrium pollen patterns arising from evidently non-  
519 equilibrium patterns of recent ancestors. For example, the families Asteraceae, Sarraceniaceae,  
520 and Cactaceae all exhibit equilibrated patterns that are nested in clades in which the other  
521 families exhibit only non-equilibrated patterns. Another possible explanation for the prevalence  
522 of the disordered states is that primexine phase separation is typically arrested by sporopollenin  
523 deposition before it can bring the pollen grain into an equilibrium pattern. In addition, cross-  
524 linkers such as calcium ions are often found in plant cell walls, the presence of which might also  
525 contribute to the formation of the more disordered patterns by arresting the underlying separation  
526 dynamics.

527 After classifying extant pollen patterns as either equilibrium states versus kinetically  
528 arrested or generally disordered patterns, both of which are predicted by the physical mechanism  
529 proposed here, we conclude from an evolutionary analysis that the highly ordered patterns for  
530 which pollen are famous have not arisen under strong selection. In fact, our results are more  
531 consistent with an evolutionary bias toward unpatterned, typically foamy (reticulate) states. This  
532 evolutionary result is also consistent with our physical picture, since the constituents of the  
533 primexine are naturally phase-separating compounds and should induce the patterning without  
534 any additional biological control. So, perhaps the exine patterns that give pollen their fascinating  
535 variety do not serve any particular purpose, but are rather a natural consequence of the  
536 composition of the primexine and simple physical principles.

537 There is much room for future work. Our theory, and its apparent reification in pollen  
538 development, describe a novel and robust mechanism for repeatedly patterning surfaces at both  
539 micron and nanometer scales. Therefore, it would be of basic interest to materials science to  
540 understand how to program the general parameters of our theory in polymer chemistry. By fully  
541 characterizing the primexine material, it would be possible to study its phase properties and their  
542 contribution to the pattern-governing parameters in our model. Finally, in contrast to the  
543 currently employed pollen descriptive scheme of overlapping categories of unit, polarity,  
544 aperture, ornamentation, and wall structure, nearly all unique pollen patterns can be fully  
545 recapitulated by a unique set of parameters in our Hamiltonian (eq. 6). It may be useful in the  
546 future to describe pollen species by these unique energetic parameters; this scheme also has the  
547 advantage that these energetic parameters will ultimately map to the biochemistry and timing of  
548 pollen development.

549

## 550 **Acknowledgements**

551 The authors gratefully acknowledge the use of the Electron Microscopy Resource Laboratory at  
552 the Perelman School of Medicine at the University of Pennsylvania. This work was supported by  
553 the Chemical Sciences, Geosciences and Biosciences Division, Office of Basic Energy Sciences,  
554 U.S. Department of Energy grant (DE-SC0015662) to Parastoo Azadi at the Complex  
555 Carbohydrate Research Center. This work was also supported by a Kaufman Foundation New  
556 Initiative Award to A.M.S., a Packard Foundation Fellowship to A.M.S., and NSF-1351935 to  
557 A.M.S.; we also gratefully acknowledge the help of summer interns through the PennLENS

558 program supported by NSF-1351935. E.M.H. and M.O.L. were supported in part by a Simons  
559 Investigator Grant to Randall D. Kamien. M.O.L. gratefully acknowledges partial funding from  
560 the Neutron Sciences Directorate (Oak Ridge National Laboratory), sponsored by the U.S.  
561 Department of Energy, Office of Basic Energy Sciences.

562

## 563 References

- 564 1. Blackmore, S., Wortley, A.H., Skvarla, J.J., & Rowley, J.R. Pollen wall development in  
565 flowering plants. *New Phytol.* **174**, 483-498 (2007)
- 566
- 567 2. Locke, M. *Microscopic Anatomy of Invertebrates*. Eds Harrison FW, Locke M (Wiley-  
568 Liss, New York) **11A**, 75–138 (1998)
- 569
- 570 3. Ariizumi, T. & Toriyama, K. Genetic regulation of sporopollenin synthesis and pollen  
571 exine development. *Annu Rev Plant Biol.* **62**, 437–460 (2011)
- 572
- 573 4. Blackmore, S. & Crane, P.R. The evolution of apertures in the spores and pollen grains of  
574 embryophytes. *Rep Biol.* 159-182 (1998)
- 575
- 576 5. Katifori, E., Alben, S., Cerda, E., Nelson, D.R., & Dumais, J. Foldable structures and the  
577 natural design of pollen grains. *PNAS* **107**, 7635-7639 (2010)
- 578
- 579 6. Owen, H.A. & Makaroff, C.A. Ultrastructure of microsporogenesis and  
580 microgametogenesis in *Arabidopsis thaliana* (L.) Heynh. ecotype Wassilewskija  
581 (Brassicaceae). *Protoplasma.* **185**, 7-21 (1995)
- 582
- 583 7. Nishikawa, S., Zinkl, G.M., Swanson, R.J., Maruyama, D., & Preuss, D. Callose ( $\beta$ -1,3  
584 glucan) is essential for *Arabidopsis* pollen wall patterning, but not tube growth. *BMC*  
585 *Plant Biol.* **5**, 22 (2005)
- 586
- 587 8. Heslop-Harrison, J. Tapetal origins of pollen-coat substances in *Lilium*. *New Phytol.* **67**,  
588 779-786 (1968)
- 589
- 590 9. Skvarla, J.J. & Larson, D.A. Fine Structural Studies of *Zea mays* Pollen I: Cell  
591 Membranes and Exine Ontogeny. *Am J Bot.* **53**, 1112-1125 (1966)
- 592
- 593 10. Godwin, H., Echlin, P., & Chapman, B. The development of the pollen grain wall in  
594 *Ipomoea purpurea* (L.) Roth. *Rev. Palaeobot. Palynol.* **3**, 181-195 . (1967)
- 595
- 596 11. Rowley, J.R. Germinal Apertural Formation in Pollen. *Taxon* **24**, 17-25 (1975)
- 597
- 598 12. Furness, C.A. A review of spiraperturate pollen. *Pollen et Spores* **27**, 307-320 (1985)
- 599

- 600 13. Albert, B., Nadot, S., Dreyer, L., & Ressayre, A. The influence of tetrad shape and  
601 intersporal callose wall formation on pollen aperture pattern ontogeny in two eudicots  
602 species. *Ann. Bot.* **106**, 557-564 (2010)  
603
- 604 14. Lavrentovich, M.O., Horsley, E.M., Radja, A., Sweeney, A.M., & Kamien, R.D. First-  
605 order patterning transitions on a sphere as a route to cell morphology. *PNAS.* **113**, 5189-  
606 5194 (2016)  
607
- 608 15. Leibler, S. & Andelman, D. Ordered and curved meso-structures in membranes and  
609 amphiphilic films. *J Phys.* **48**, 2013–2018 (1987)  
610
- 611 16. Dharmavaram, S., Xie, F., Klug, W., Rudnick, J., & Bruinsma, R. Landau theory and the  
612 emergence of chirality in viral capsids. *EPL* **116**, 26002 (2016)  
613
- 614 17. Dharmavaram, S., Xie, F., Klug, W., Rudnick, J., & Bruinsma, R. Orientational phase  
615 transitions and the assembly of virus capsids. *Phys. Rev. E.* **95**, 062402 (2017)  
616
- 617 18. Andelman, D., Kawakatsu, T., Kawasaki, K. Equilibrium shape of two-component  
618 unilamellar membranes and vesicles. *Europhys. Lett.* **19**, 57-62 (1992)  
619
- 620 19. Taniguchi, T., Kawasaki, K., Andelman, D. and Kawakatsu, T. Phase transitions and  
621 shapes of two component membranes and vesicles II : weak segregation limit. *J. Phys. II*  
622 *France.* **4**, 1333-1362 (1994)  
623
- 624 20. Zhang, L., Wang, L., & Lin, J. Defect structures and ordering behaviours of diblock  
625 copolymers self-assembling on spherical substrates. *Soft Matter.* **10**, 6713–6721 (2014)  
626
- 627 21. Sannier, J., Baker, W.J., Anstett, M.C., & Nadot, S. A comparative analysis of pollinator  
628 type and pollen ornamentation in the Araceae and the Arecaceae, two unrelated families  
629 of the monocots. *BioMed Central.* **2**, 145 (2009)  
630
- 631 22. Furness, C.A. & Rudall, P.J. Pollen aperture evolution – a crucial factor for eudicot  
632 success? *Trends in Plant Sci.* **9**, 154-158 (2004)  
633
- 634 23. Gabarayeva, N.I. & Grigorjeva, V.V. Exine development in *Stangeria eriopus*  
635 (*Stangeriaceae*): ultrastructure and substructure, sporopollenin accumulation, the  
636 equivocal character of the aperture, and stereology of microspore organelles. *Rev.*  
637 *Palaeobot. Palynol.* **122**, 185-218 (2002)  
638
- 639 24. Kirkpatrick, A.B. & Owen, H.A. Observation of early pollen exine patterning by  
640 scanning electron microscopy. *Microsc. Microanal.* **19**, 134-135 (2013)  
641

- 642 25. Santander, J. *et al.* Mechanisms of intrinsic resistance to antimicrobial peptides  
643 of *Edwardsiella ictaluri* and its influence on fish gut inflammation and virulence.  
644 *Microbiology*. **159**, 1471-1486 (2013)  
645
- 646 26. Tolstoguzov, V. Phase behavior in mixed polysaccharide systems. *Food Polysaccharides*  
647 *and Their Applications 2<sup>nd</sup> ed.* Eds. Stephen AM, Phillips GO, Williams PA. Boca Raton:  
648 Taylor & Francis 589-627 (2006)  
649
- 650 27. Kim, S. & Willett, J. L. Isolation of amylose from starch solutions by phase separation.  
651 *Starch*. **56**, 29-36 (2004)  
652
- 653 28. Abramowitz, M. & Stegun, I.A. *Handbook of Mathematical Functions* (National Bureau  
654 of Standards, Washington, DC) (1972)  
655
- 656 29. Johansson, H.T. & Forssén, C. Fast and accurate evaluation of Wigner 3j, 6j, and 9j  
657 symbols using prime factorisation and multi-word integer arithmetic. ArXiv: 1504.08329  
658 (2015)  
659
- 660 30. Kamien, R.D. The geometry of soft materials: A primer. *Rev Mod Phys*. **74**, 953–971.  
661 (2002)  
662
- 663 31. Press, W.H., Teukolsky, S.A., Vetterling, W.T., & Flannery, B.P. *Numerical Recipes :  
664 the Art of Scientific Computing*. Cambridge [Cambridgeshire]: Cambridge University  
665 Press (1986)  
666
- 667 32. Elder, K.R., Katakowski, M., Haataja, M., & Grant, M. Modeling Elasticity in Crystal  
668 Growth. *Phys Rev Lett*. **88**, 245701 (2002)  
669
- 670 33. Guyer, J.E., Wheeler, D., & Warren, J.A. FiPy: Partial Differential Equations with  
671 Python. *Comput Sci Eng*. **11**, 6-15 (2009)  
672
- 673 34. Guttenberg, N., Goldenfeld, N. & Dantzig, J. Emergence of foams from the breakdown of  
674 the phase field crystal model. *Phys. Rev. E*. **81**, 065301 (2010)  
675
- 676 35. PalDat – a palynological database (2000 onwards, [www.paldat.org](http://www.paldat.org)), downloaded on  
677 9/27/16)  
678
- 679 36. Weber, M., Halbritter, H., & Hesse, M. The spiny pollen wall in Sauromatum (Araceae) –  
680 with special reference to the endexine. *Int. J. Plant Sci*. **159**, 744-749 (1998)  
681
- 682 37. Harris, L. W., Jonathan Davies, T. A Complete Fossil-Calibrated Phylogeny of Seed  
683 Plant Families as a Tool for Comparative Analyses: Testing the ‘Time for Speciation’  
684 Hypothesis. *PLoS ONE*. **10**, e0162907 (2016)

- 685  
686 38. Hinchliff, C. E. *et al.* Synthesis of phylogeny and taxonomy into a comprehensive tree of  
687 life. *PNAS*. **112**, 12764-12769 (2015)  
688  
689 39. Pagel, M., Meade, A., 2006. BayesTraits. Available from:  
690 <<http://www.evolution.rdg.ac.uk/BayesTraits.html>>.
- 691  
692 40. Pagel, M. The Maximum likelihood approach to reconstructing ancestral character states  
693 of discrete characters on phylogenies. *Syst Biol*. **48**, 612-622 (1999)  
694  
695 41. Sigrist, R., Matthews, P. Symmetric spiral patterns on spheres. *SIAM J Appl Dyn Syst*. **10**,  
696 1177–1211 (2011)  
697  
698 42. Brazovskii, S.A. Phase transition of an isotropic system to a nonuniform state. *J Exp*  
699 *Theor Phys*. **68**,175-185 (1975)  
700  
701 43. Brazovskii, S.A., Dzyaloshinskii, I.E., & Muratov, A.R. Theory of weak crystallization. *J*  
702 *Exp Theor Phys*. **66**, 625-633 (1987)  
703  
704 44. Fitzgerald, M.A. & Knox, R.B. Initiation of primexine in freeze-substituted microspores  
705 of *Brassica campestris*. *Sex plant reprod*. **8**, 99-104 (1995)  
706  
707 45. Takahashi, M. Development of the echinate pollen wall in *Farfugium japonicum*  
708 (Compositae: Senecionea). *Bot. Mag*. **102**, 219-234 (1989)
